# Supplementary material
Source: PubMed Central journal article supplement (PMC3538464)
Supplement: mmc1.pdf [file mmc1.pdf]

## Appendix A—Contrast Media Specifications

| Product                                 | Chemical Structure | Anion       | Cation           | % Salt Concentration | % Iodine Concentration | Iodine+ (mg/ml) | Viscosity+ 25° C (cps)                                      | Viscosity+ 37° C (cps) | Osmolality (mOsm/kg H <sub>2</sub> O) |
|-----------------------------------------|--------------------|-------------|------------------|----------------------|------------------------|-----------------|-------------------------------------------------------------|------------------------|---------------------------------------|
| <b>INTRAVASCULAR</b>                    |                    |             |                  |                      |                        |                 |                                                             |                        |                                       |
| Omnipaque®                              |                    |             |                  |                      |                        |                 |                                                             |                        |                                       |
| 140 (GE Healthcare)                     | Iohexol            | Nonionic    | Nonionic         | None                 | 14                     | 140             | 2.3*                                                        | 1.5                    | 322                                   |
| Conray™ 30 (Covidien)                   | Ionic              | lothalamate | Meglumine        | 30                   | 14.1                   | 141             | 2                                                           | 1.5                    | 600                                   |
| Ultravist® 150 (Bayer HealthCare)       | Iopromide          | Nonionic    | Nonionic         | <0.1                 | 15                     | 150             | 2.3*                                                        | 1.5                    | 328                                   |
| Optiray™ 160 (Covidien)                 | Ioversol 34%       | Nonionic    | Nonionic         | None                 | 16                     | 160             | 2.7                                                         | 1.9                    | 355                                   |
| Isovue®-200 (Bracco)                    | Iopamidol 40.8%    | Nonionic    | Nonionic         | None                 | 20                     | 200             | 3.3*                                                        | 2.0                    | 413                                   |
| Conray™ 43 (Covidien)                   | Ionic              | lothalamate | Meglumine        | 43                   | 20.2                   | 202             | 3                                                           | 2                      | 1000                                  |
| Omnipaque® 240 (GE Healthcare)          | Iohexol 51.8%      | Nonionic    | Nonionic         | None                 | 24                     | 240             | 5.8*                                                        | 3.4                    | 520                                   |
| Optiray™ 240 (Covidien)                 | Ioversol 51%       | Nonionic    | Nonionic         | None                 | 24                     | 240             | 4.6                                                         | 3.0                    | 502                                   |
| Ultravist® 240 (Bayer Healthcare)       | Iopromide          | Nonionic    | Nonionic         | <0.1                 | 24                     | 240             | 4.9*                                                        | 2.8                    | 483                                   |
| Isovue® -250 (Bracco)                   | Iopamidol 51%      | Nonionic    | Nonionic         | None                 | 25                     | 250             | 5.1*                                                        | 3.0                    | 524                                   |
| Visipaque® 270 (GE Healthcare)          | Iodixanol          | Nonionic    | Nonionic         | None                 | 27                     | 270             | 12.7*                                                       | 6.3                    | 290                                   |
| Conray™ (Covidien)                      | Ionic              | lothalamate | Meglumine        | 60                   | 28.2                   | 282             | 6                                                           | 4                      | 1400                                  |
| Isovue® 300 (Bracco)                    | Iopamidol 61.2%    | Nonionic    | Nonionic         | None                 | 30                     | 300             | 8.8*                                                        | 4.7                    | 616                                   |
| Omnipaque®-300 (GE Healthcare)          | Iohexol 64.7%      | Nonionic    | Nonionic         | None                 | 30                     | 300             | 11.8*                                                       | 6.3                    | 672                                   |
| Optiray™ 300 (Covidien)                 | Ioversol 64%       | Nonionic    | Nonionic         | None                 | 30                     | 300             | 8.2                                                         | 5.5                    | 651                                   |
| Oxilan® 300 (Guerbet)                   | Ioxilan 62.3%      | Nonionic    | Nonionic         | None                 | 30                     | 300             | 9.4*                                                        | 5.1                    | 585                                   |
| Ultravist® 300 (Bayer Healthcare)       | Iopromide          | Nonionic    | Nonionic         | <0.1                 | 30                     | 300             | 9.2*                                                        | 4.9                    | 607                                   |
| Hexabrix™ (Covidien)                    | Ionic              | loxaglate   | Meglumine Sodium | 39.3<br>19.6         | 32                     | 320             | 15.7*                                                       | 7.5                    | ≈600                                  |
| Optiray™320 (Covidien)                  | Ioversol 68%       | Nonionic    | Nonionic         | None                 | 32                     | 320             | 9.9                                                         | 5.8                    | 702                                   |
| Visipaque®-320 (GE Healthcare)          | Iodixanol          | Nonionic    | Nonionic         | None                 | 32                     | 320             | 26.6                                                        | 11.8                   | 290                                   |
| Optiray™ 350 (Covidien)                 | Ioversol 74%       | Nonionic    | Nonionic         | None                 | 35                     | 350             | 14.3                                                        | 9.0                    | 792                                   |
| Omnipaque®-350 (GE Healthcare)          | Iohexol 75.5%      | Nonionic    | Nonionic         | None                 | 35                     | 350             | 20.4*                                                       | 10.4                   | 844                                   |
| Oxilan® 350 (Guerbet)                   | Ioxilan 72.7%      | Nonionic    | Nonionic         | None                 | 35                     | 350             | 16.3*                                                       | 8.1                    | 695                                   |
| Isovue®-370 (Bracco)                    | Iopamidol 75.5%    | Nonionic    | Nonionic         | None                 | 37                     | 370             | 20.9*                                                       | 9.4                    | 796                                   |
| MD-76™ R (Covidien)                     | Ionic              | Diatrizoate | Meglumine Sodium | 66<br>10             | 37                     | 370             | 16.4                                                        | 10.5                   | 1551                                  |
| Ultravist® 370 (Bayer Healthcare)       | Iopromide          | Nonionic    | Nonionic         | <0.1                 | 37                     | 370             | 22.0*                                                       | 10.0                   | 774                                   |
| Cholografin® (Bracco)                   | Ionic              | Iodipamide  | Meglumine        | 52                   | 25.7                   | 257             | 6.6                                                         | 5.6                    | 664                                   |
| <b>GASTROINTESTINAL – Oral Contrast</b> |                    |             |                  |                      |                        |                 |                                                             |                        |                                       |
| Gastrografin® (Bracco)                  | Ionic              | Diatrizoate | Meglumine Sodium | 66<br>10             | 37                     | 370             |                                                             | 8.4                    | 1940                                  |
| MD-Gastroview™ (Covidien)               | Ionic              | Diatrizoate | Meglumine Sodium | 66<br>10             | 37                     | 370             |                                                             |                        | 2000                                  |
| Omnipaque® 180 (GE Healthcare)          | Iohexol            | Nonionic    | None             | 18                   | 18                     | 180             | 3.1*                                                        | 2.0                    | 331                                   |
| Omnipaque® 240 (GE Healthcare)          | Iohexol            | Nonionic    | None             | 24                   | 24                     | 240             | 5.8*                                                        | 3.4                    | 520                                   |
| Omnipaque® 300 (GE Healthcare)          | Iohexol            | Nonionic    | None             | 30                   | 30                     | 300             | 11.8*                                                       | 6.3                    | 672                                   |
| Omnipaque® 350 (GE Healthcare)          | Iohexol            | Nonionic    | None             | 35                   | 35                     | 350             | 20.4*                                                       | 10.4                   | 844                                   |
| <b>URORADIOLOGICAL</b>                  |                    |             |                  |                      |                        |                 |                                                             |                        |                                       |
| Cystografin® (Bracco)                   | Ionic              | Diatrizoate | Meglumine        | 30                   | 14.1                   | 141             | 2.0                                                         | 1.5                    | 556                                   |
| Cystografin® Dilute (Bracco)            | Ionic              | Diatrizoate | Meglumine        | 18                   | 8.5                    | 85              | 1.4                                                         | 1.1                    | 349                                   |
| Cysto-Conray™ II (Covidien)             | Ionic              | lothalamate | Meglumine        | 17.2                 | 8.1                    | 81              | (Instill for retrograde cystography and cystourethrography) |                        |                                       |
| Conray™ 43 (Covidien)                   | Ionic              | lothalamate | Meglumine        | 43                   | 20.2                   | 202             | 3                                                           | 2                      | 1000                                  |
| Omnipaque® 240 (GE Healthcare)          | Nonionic           | Nonionic    | None             | 24                   | 240                    |                 | 5.8*                                                        | 3.4                    | 520                                   |
| Omnipaque® 300 (GE Healthcare)          | Iohexol            | Nonionic    | None             | 30                   | 30                     | 300             | 11.8*                                                       | 6.3                    | 672                                   |
| Omnipaque® 350 (GE Healthcare)          | Iohexol            | Nonionic    | None             | 35                   | 35                     | 350             | 20.4*                                                       | 10.4                   | 844                                   |
| Visipaque® 270 (GE Healthcare)          | Iodixanol          | Nonionic    | None             | 27                   | 27                     | 270             | 12.7*                                                       | 6.3                    | 290                                   |

Appendix A continues on next page

## Appendix A—Contrast Media Specifications (continued)

| Product                                | Chemical Structure                     | Anion          | Cation      | % Salt Concentration | % Iodine Concentration | Iodine+ (mg/ml) | Viscosity+ 25° C (cps) | Viscosity+ 37° C (cps) | Osmolality (mOsm/kg H <sub>2</sub> O) |
|----------------------------------------|----------------------------------------|----------------|-------------|----------------------|------------------------|-----------------|------------------------|------------------------|---------------------------------------|
| <b>URORADIOLOGICAL</b>                 |                                        |                |             |                      |                        |                 |                        |                        |                                       |
| Visipaque 320 (GE Healthcare)          | Iodixanol                              | Nonionic       | None        | 32                   | 32                     | 320             | 26.6                   | 11.8                   | 290                                   |
| <b>INTRATHECAL</b>                     |                                        |                |             |                      |                        |                 |                        |                        |                                       |
| Omnipaque* 180 (GE Healthcare)         | Iohexol                                | Nonionic       | Nonionic    | None                 | 18                     | 180             | 3.1*                   | 2.0                    | 408                                   |
| Omnipaque® 240 (GE Healthcare)         | Iohexol                                | Nonionic       | None        | 24                   | 24                     | 240             | 5.8*                   | 3.4                    | 520                                   |
| Omnipaque® 300 (GE Healthcare)         | Iohexol                                | Nonionic       | None        | 30                   | 30                     | 300             | 11.8*                  | 6.3                    | 672                                   |
| Isovue-M® 200 (Bracco)                 | Iopamidol                              | Nonionic       | Nonionic    | None                 | 20                     | 200             | 3.3*                   | 2.0                    | 413                                   |
| Isovue-M® 300                          | Iopamidol                              | Nonionic       | Nonionic    | None                 | 30                     | 300             | 8.8*                   | 4.7                    | 616                                   |
| <b>BODY CAVITY</b>                     |                                        |                |             |                      |                        |                 |                        |                        |                                       |
| Omnipaque* 180 (GE Healthcare)         | Iohexol                                | Nonionic       | None        | None                 | 18                     | 180             | 3.1*                   | 2.0                    | 408                                   |
| Omnipaque® 240 (GE Healthcare)         | Iohexol                                | Nonionic       | None        | 24                   | 24                     | 240             | 5.8*                   | 3.4                    | 520                                   |
| Omnipaque® 300 (GE Healthcare)         | Iohexol                                | Nonionic       | None        | 30                   | 30                     | 300             | 11.8*                  | 6.3                    | 672                                   |
| Omnipaque® 350 (GE Healthcare)         | Iohexol                                | Nonionic       | None        | 35                   | 35                     | 350             | 20.4*                  | 10.4                   | 844                                   |
| <b>MR CONTRAST MEDIA</b>               |                                        |                |             |                      |                        |                 |                        |                        |                                       |
| Magnevist® (Bayer Healthcare)          | Ionic Linear                           | Gadopen-tetate | Dimeglumine |                      |                        |                 | 4.9*                   | 2.9                    | 1960                                  |
| Prohance® (Bracco)                     | Nonionic GD-HP-DOTA Gadoteridol        |                |             |                      |                        |                 | 2.0*                   | 1.3                    | 630                                   |
| MultiHANCE® (Bracco)                   | Ionic Linear                           | Gadobenate     | Dimeglumine |                      |                        |                 | 9.2*                   | 5.3                    | 1970                                  |
| Omniscan® (GE Healthcare)              | Gd-DTPA-BMA Linear                     | Nonionic       |             |                      |                        |                 | 2.0                    | 1.4                    | 789                                   |
| OptiMARK™ (Covidien)                   | Nonionic Gd-DTPA-BMEA Gadoversetamide  | None           | None        |                      |                        |                 | 2.8**                  | 2.0                    | 1110                                  |
| EOVIST® (Bayer Healthcare)             | Ionic Linear                           | Gadoxetate     | Disodium    |                      |                        |                 | n/a                    | 1.19                   | 688                                   |
| Gastromark™ (Covidien) Oral Suspension | Nonionic Ferrousferic oxide ferumoxsil | None           | None        |                      |                        |                 |                        |                        |                                       |

+ Data from product package inserts, product brochures, or technical information services.

\* Measured at 20o C.

\*\* Data on file with Covidien

\*\*\* Hexabrix is licensed by a registered trademark of Guerbet, S.A. and sold by Covidien in the U.S.

o Viscosities of most products intended for oral administration are not reported by manufacturers.
